# Supplementary material for: Carbohydrate-based drugs launched during 2000−2021
Source: PubMed Central journal article supplement — Acta Pharm Sin B. 2022 May 23;12(10):3783–821. doi: 10.1016/j.apsb.2022.05.020 (PMC9532563; doi:10.1016/j.apsb.2022.05.020), 2022-05-23
Supplement: mmc1.pdf [file mmc1.pdf]

## Supplementary Information for

### Review

#### Carbohydrate-based drugs launched during 2000–2021

Xin Cao<sup>a,\*†</sup>, Xiaojing Du<sup>a,†</sup>, Heng Jiao<sup>a,†</sup>, Quanlin An<sup>a</sup>, Ruoxue Chen<sup>a</sup>, Pengfei Fang<sup>b</sup>,  
Jing Wang<sup>b</sup>, Biao Yu<sup>b,\*</sup>

<sup>a</sup>*Zhongshan Hospital Institute of Clinical Science, Fudan University Shanghai Medical College, Shanghai 200032, China*

<sup>b</sup>*State Key Laboratory of Bio-organic and Natural Products Chemistry, Center for Excellence in Molecular Synthesis, Shanghai Institute of Organic Chemistry, Chinese Academy of Sciences, Shanghai 200032, China*

\*Corresponding authors. Tel.: +86 21 64941990; fax: +86 21 64941990.

E-mail addresses: caox@fudan.edu.cn (Xin Cao), byu@sioc.ac.cn (Biao Yu).

†These authors made equal contributions to this work.

Received 2 March 2022; received in revised form 18 April 2022; accepted 12 May 2022

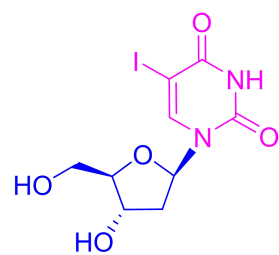

**60 Idoxuridine**

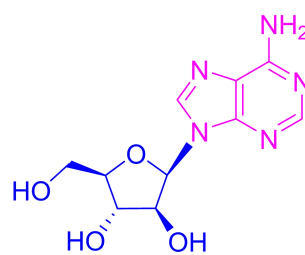

**61 Vidarabine**

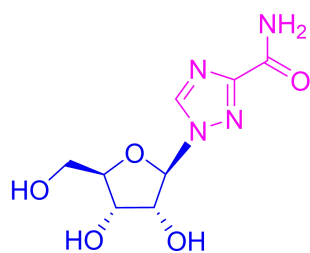

**62 Ribavirin**

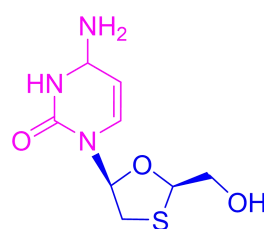

**63 Lamivudine**

**Figure S1.** Representative antiviral nucleoside drugs (**60–63**) launched before 2000.

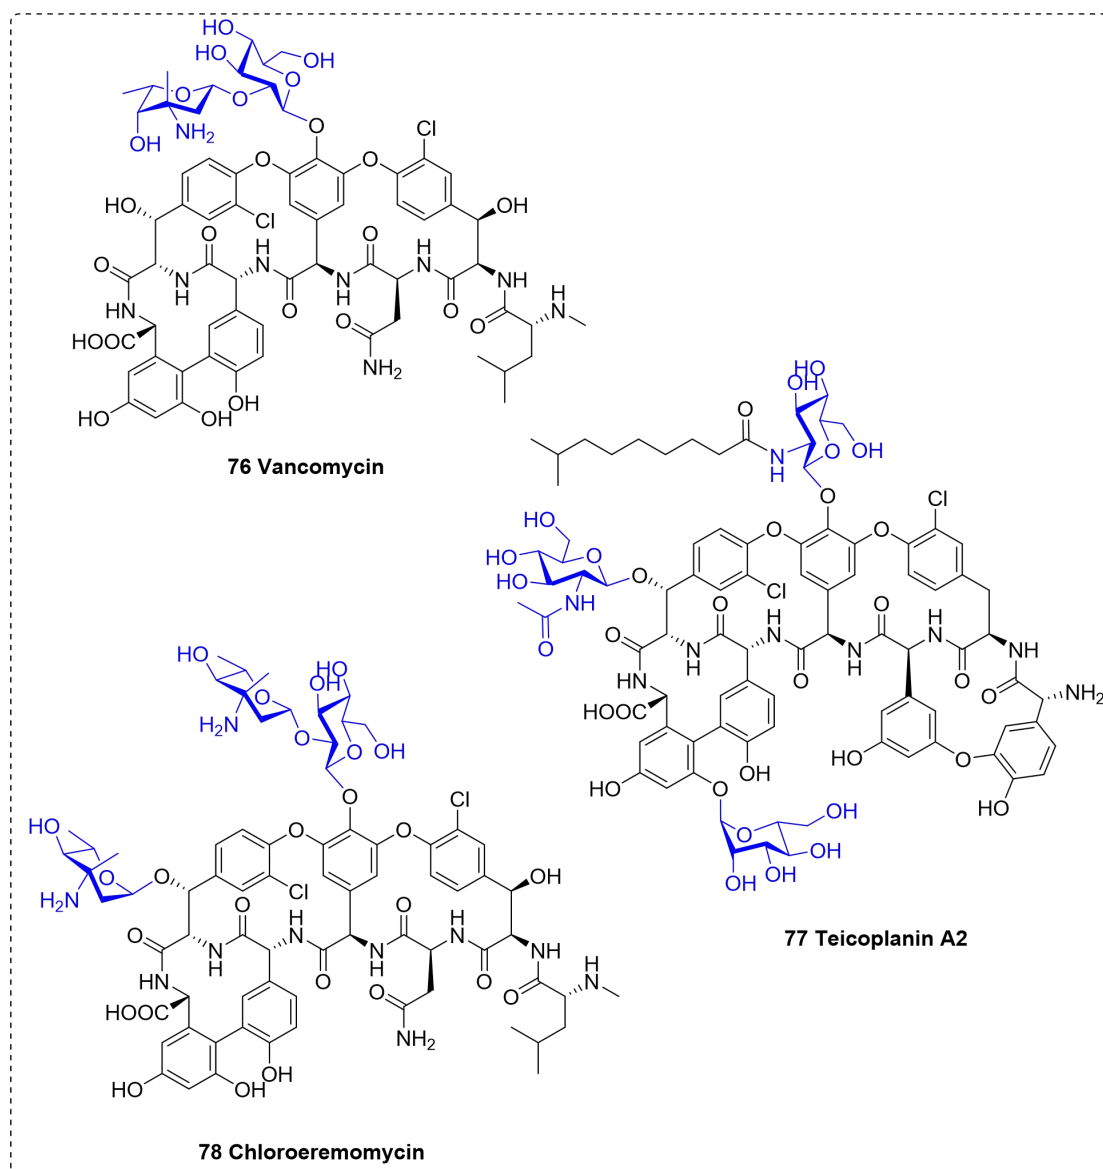

**Figure S2.** The representative early glycopeptide antibiotics **76–78**.

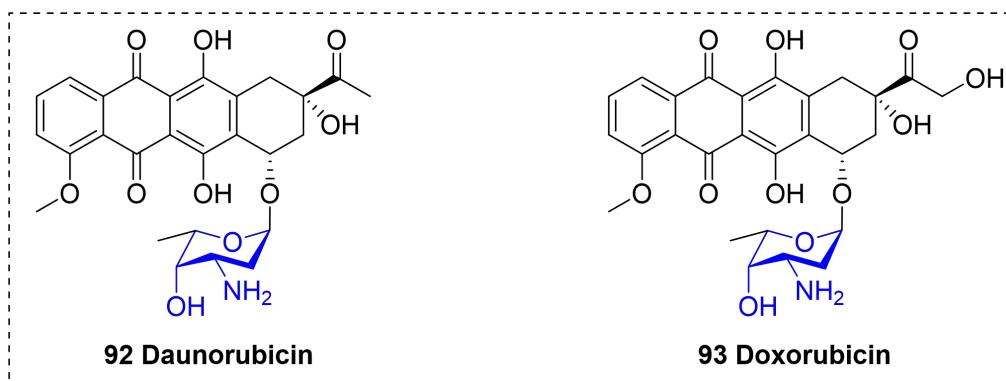

**Figure S3.** The chemical structure of Daunorubicin (**92**) and Doxorubicin (**93**).

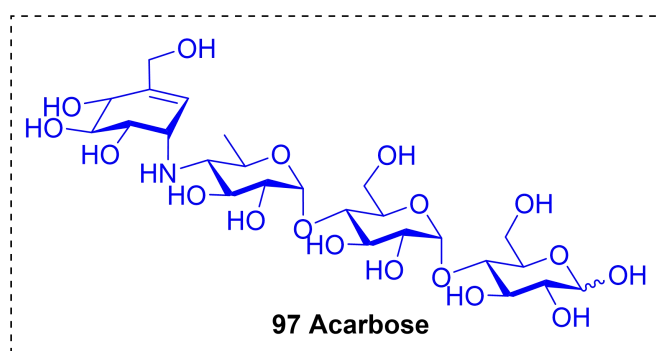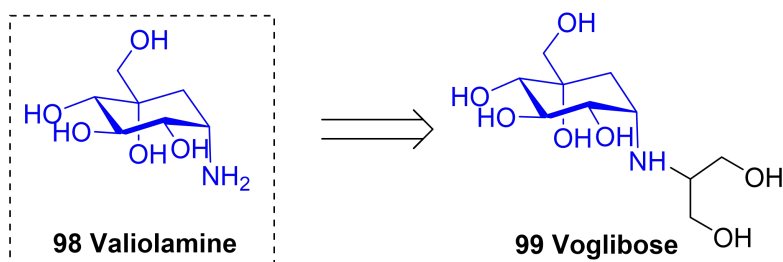

**Figure S4.** The conventional  $\alpha$ -glucosidase and  $\alpha$ -amylase inhibitors Acarbose (**97**) and Voglibose (**99**).

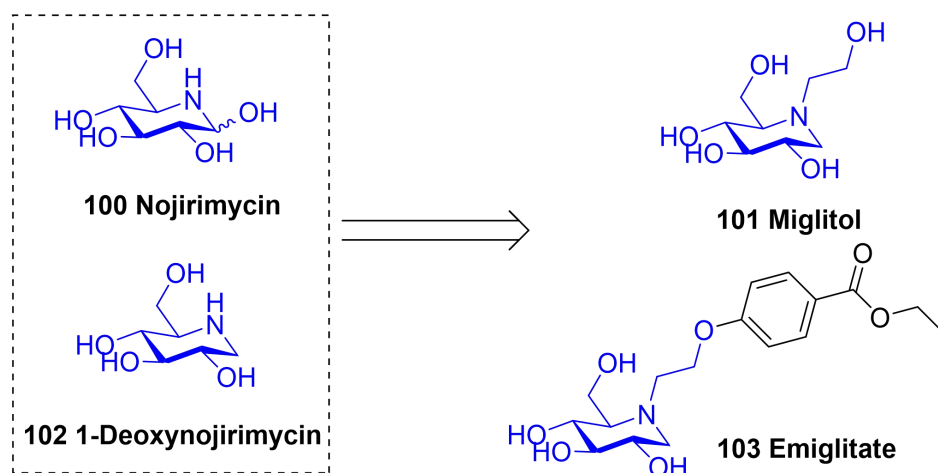

**Figure S5.** The  $\alpha$ -glucosidase inhibitors Miglitol (**101**) and Emiglitate (**103**) derived from natural iminosugars.

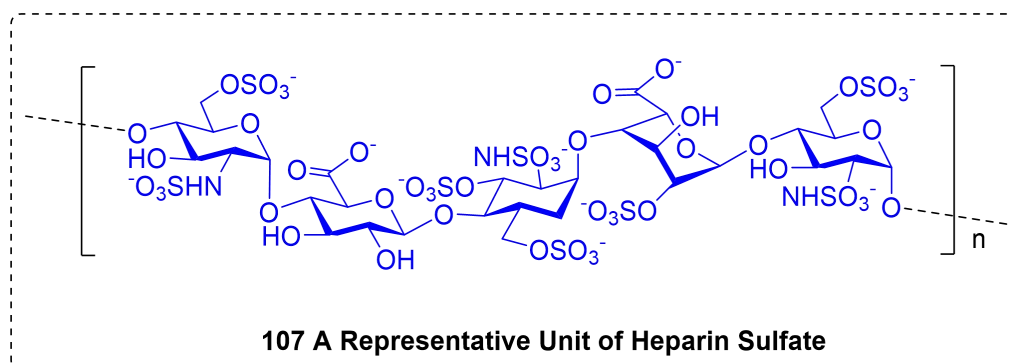

**Figure S6.** A representative pentasaccharide unit of Heparin Sulfate (**107**).

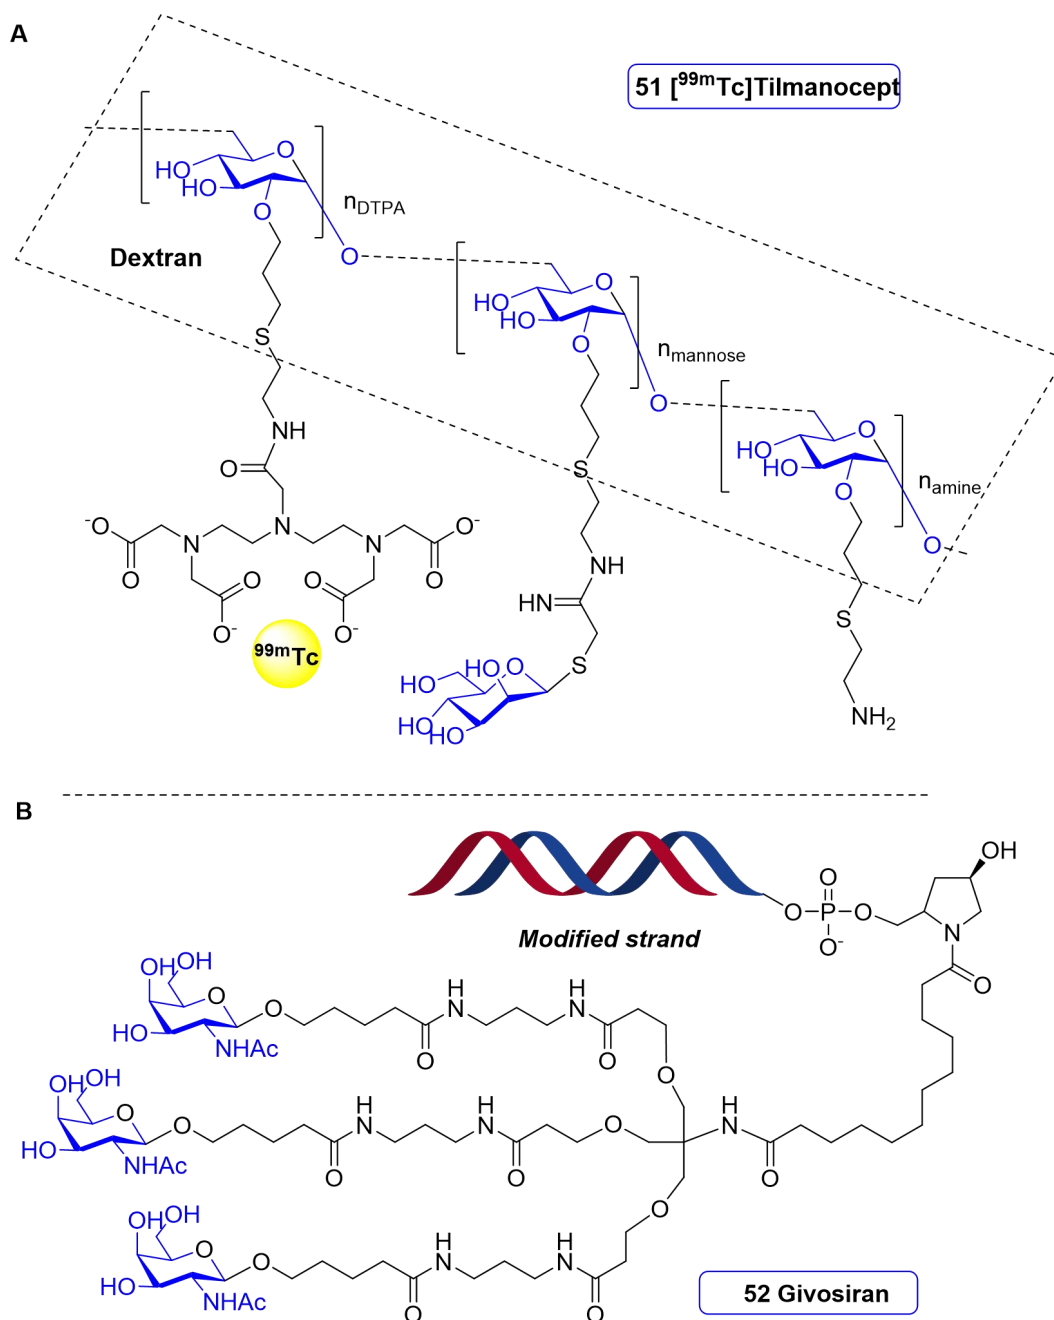

**Figure S7.** [<sup>99m</sup>Tc]Tilmanocept and Givosiran. (A) The lymphatic mapping agent [<sup>99m</sup>Tc]Tilmanocept (**51**) derived from dextran. (B) The structure diagram of the carbohydrate-enhanced siRNA drug Givosiran (**52**).

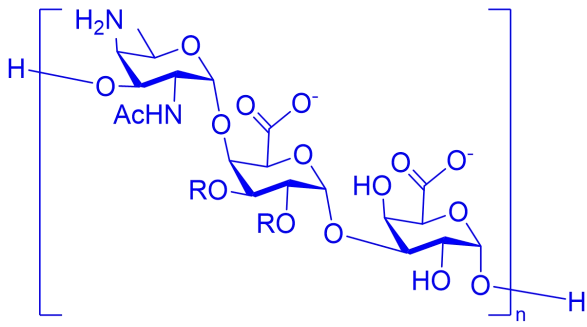

***S. pneumoniae* serotype 1 antigen**

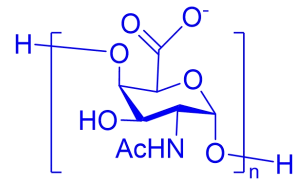

**Typhi Vi antigen**

**Figure S8.** Representative glycan antigens for glycoconjugate vaccines.
